# Supplementary material for: Mucosal and systemic T cell response in mice intragastrically infected with Neospora caninum tachyzoites
Source: PubMed Central journal article supplement (PMC3751650; doi:10.1186/1297-9716-44-69), 2013-08-10

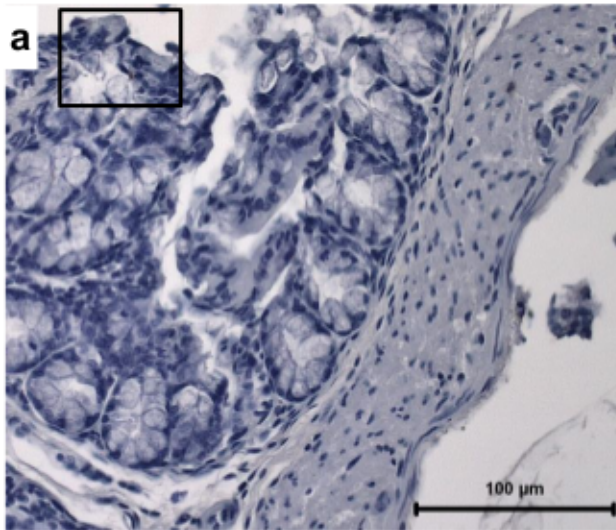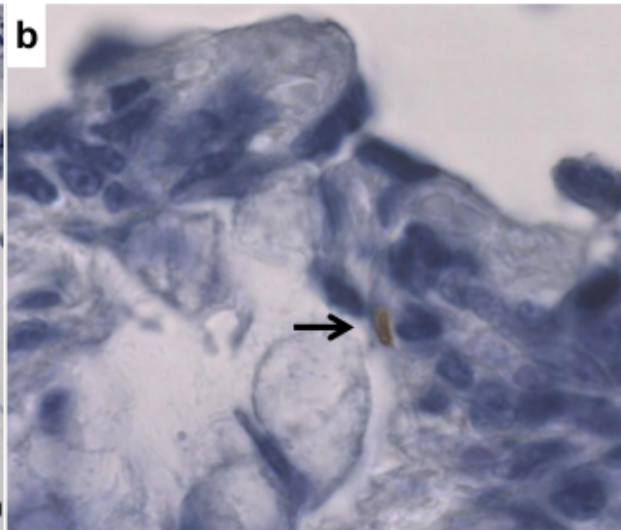

Supplement: 1297-9716-44-69-S1.pdf [file 1297-9716-44-69-S1.pdf]
